# Supplementary material for: Impact of a Father–Child, Community-Based Healthy Lifestyle Program: Qualitative Perspectives from the Family Unit
Source: Springer Nature journal article supplement (doi:10.1007/s10826-023-02651-8), 2023-08-19
Supplement: MOESM2 [file 25941712]

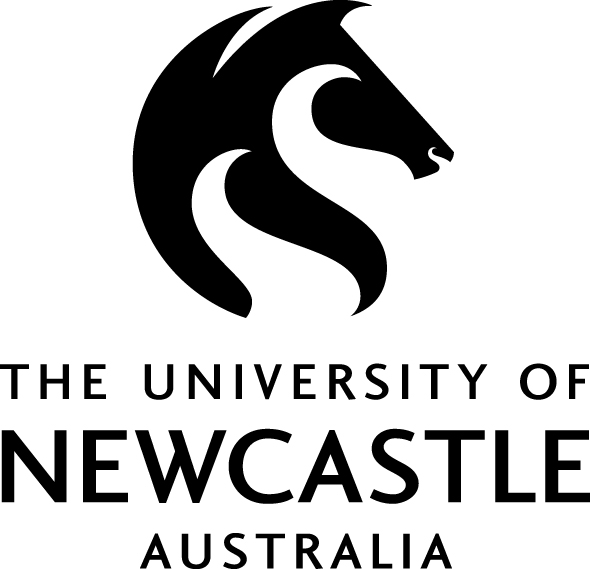
Supplementary File 2 – Focus group guide

**Impact of a father–child, community-based healthy lifestyle program: qualitative perspectives from the family unit.**

**Authors:** Lee M. Ashton1,2,3, Myles D. Young1,4, Emma R. Pollock1,2, Alyce T. Barnes1,2, Erin Christensen2, Vibeke Hansen5, Adam Lloyd2,6, Philip J. Morgan1,2*.

***Corresponding Author:** Philip J Morgan, ATC building, University of Newcastle, University Drive, Callaghan, NSW 2308, Australia. Phone: +612 49 217 265. Email: philip.morgan@newcastle.edu.au.

**FATHERS FOCUS GROUP QUESTIONS**

**About you**

1. Your name, your children(s) names?

**Program experiences**

1. Tell me about your experience in the HDHK information sessions (prompt for Dads only sessions). What did/didn’t you enjoy/like/find useful?
2. Tell me about your experience in the physical activity sessions in HDHK? (prompt Dads & Kids sessions). What did /didn’t you enjoy/like/find useful?
3. Tell me about your thoughts and experience of having a ‘dads only’ environment in the program.
4. Has the program provided you with any useful strategies to overcome barriers you faced being active or eating well prior to HDHK? (prompt for green slips, resources, goal setting, pedometers, pathways document, family support)

Has the HDHK program changed your family’s lives? In relation to:

Physical activity? How? Why?

Nutrition? How? Why?

Family relationships? How? Why?

Parenting? How? Why?

**MOTHER/PARTNER’S FOCUS GROUP QUESTIONS**

**About you**

1. Your name, your children(s) names?

**Program experiences**

1. What were your initial thoughts about the HDHK program when you first heard it was a ‘Dads’ and ‘Kids’ program?
2. What did you like/dislike about the HDHK program? Why?
3. Did you partner share information from HDHK with you? Did this information change your parenting practices or behaviours? Why/Why not?
4. Would you have liked to be more involved in the HDHK program? How? Why?
5. What kinds of things would you do when the ‘dads only’ and ‘dads & kids sessions’ were on? Why?

Has the HDHK program changed your family’s lives? In relation to:

Physical activity? How? Why?

Nutrition? How? Why?

Family relationships? How? Why?

Parenting? How? Why?

**CHILDREN’S FOCUS GROUP QUESTIONS**

**About you**

1. Your name, your dads Name?

**Program experiences**

Did you enjoy coming to HDHK with your dad? Why/Why not?

What kinds of activities did you enjoy doing with your dad at HDHK? Why?

What kinds of activities didn’t you enjoy doing at HDHK? Why?

What kinds of activities did you do at home with your dad? Did your mum also do this with you?

Did you enjoy the activities you did at home with your dad? Why/Why not?

Do you think your dad enjoyed HDHK? Why – what does he say or do?

Has your Dad changed since doing HDHK? How – what does he say or do?
